# Supplementary material for: Regulating health and nutrition claims in the UK using a nutrient profile model: an explorative modelled health impact assessment
Source: Springer Nature journal article supplement (doi:10.1186/s12966-019-0778-5), 2019-02-07
Supplement: MOESM1 [file 12966_2019_778_MOESM1_ESM.pdf]

## Supplementary information for 'Regulating health and nutrition claims in the UK using a nutrient profile model: an explorative modelled health impact assessment'

Dr Asha Kaur, Dr Peter Scarborough, Professor Mike Rayner.  
Centre on Population Approaches for Non-Communicable Disease Prevention  
Nuffield Department of Population Health, University of Oxford

|                                                                                                                                                       |   |
|-------------------------------------------------------------------------------------------------------------------------------------------------------|---|
| BACKGROUND .....                                                                                                                                      | 1 |
| PRIME.....                                                                                                                                            | 1 |
| METHODS.....                                                                                                                                          | 2 |
| Description of scenarios.....                                                                                                                         | 2 |
| <i>Figure 1. Baseline scenario</i> .....                                                                                                              | 2 |
| <i>Figure 2. Health-related claims restricted (Models 1a, 2a)</i> .....                                                                               | 3 |
| <i>Figure 3. Health-related claims restricted and reformulated (Models 1b, 2b)</i> .....                                                              | 3 |
| Draft EU nutrient profile model for the regulation of health and nutrition claims .....                                                               | 4 |
| RESULTS.....                                                                                                                                          | 5 |
| Table 1. Nutrient intake (per day) under each health-related claim (HRC) scenario.....                                                                | 5 |
| Table 2. Nutrient intake (by food group) under each health-related claim (HRC) scenario, purchase averages g/ml per person, per week (LCF 2014) ..... | 6 |

### BACKGROUND

Non-communicable disease (NCD) modelling involves examining different behaviours/risk factors ('inputs'), such as dietary behaviour, and the associated risk of developing and/or dying from a disease ('outcomes'). NCD modelling can be used for a variety of purposes including to inform decision-making (e.g. modelling cost effectiveness of different interventions/policies such as taxes on less healthy foods and/or subsidies on healthier foods<sup>1</sup>), and estimating future disease incidence and mortality trends<sup>2</sup>.

### PRIME

In this study, we build upon a pre-established NCD scenario model, the Preventable Risk Integrated ModEl (PRIME<sup>3</sup>) to model the impact of nutrient intakes associated with different food labelling scenarios on UK mortality rates.

---

<sup>1</sup> Cobiac, L.J., et al., *Taxes and Subsidies for Improving Diet and Population Health in Australia: A Cost-Effectiveness Modelling Study*. PLoS Med, 2017. **14**(2): p. e1002232.

<sup>2</sup> Webber, L., et al., The Brighton declaration: the value of non-communicable disease modelling in population health sciences. *Eur J Epidemiol*, 2014. **29**(12): p. 867-70.

<sup>3</sup> Scarborough, P., et al., *The Preventable Risk Integrated ModEl and Its Use to Estimate the Health Impact of Public Health Policy Scenarios*. Scientifica (Cairo), 2014. **2014**: p. 748750.

PRIME estimates the number of deaths averted for 24 health outcomes, these are grouped into the following categories, cardiovascular disease (CVD), diabetes, cancer, chronic obstructive pulmonary disease (COPD), kidney disease, and liver disease. This model has been used in 11 published studies to estimate the number of deaths averted or delayed under different conditions. For example, for the UK it was estimated that 33000 deaths per year would be avoided if UK dietary recommendations were met<sup>4</sup>.

## METHODS

This section provides additional information on how we modelled each scenario.

### Description of scenarios

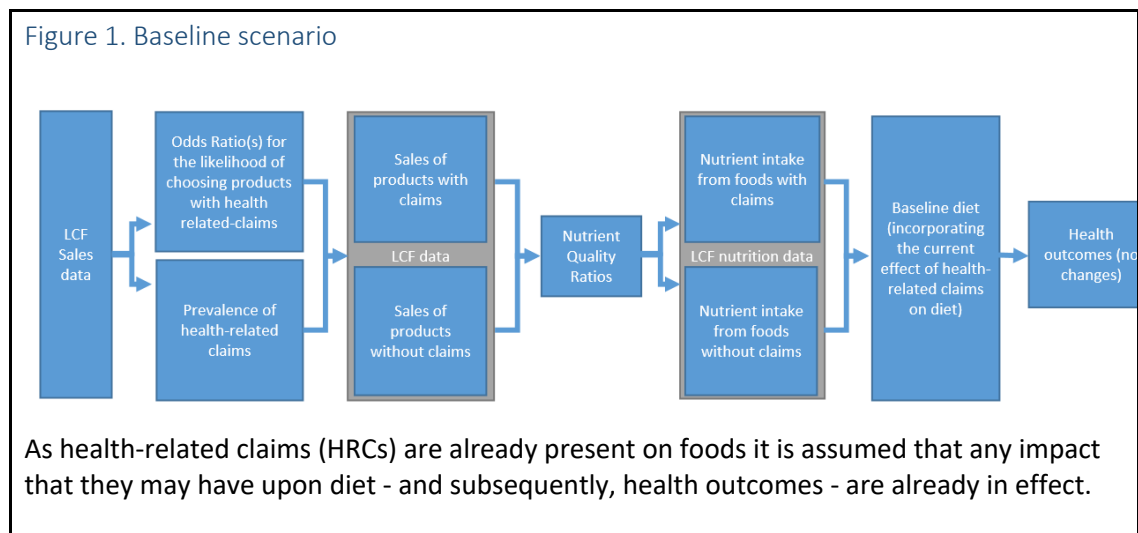

<sup>4</sup> Scarborough, P., et al., *Modelling the impact of a healthy diet on cardiovascular disease and cancer mortality*. *Journal of Epidemiology and Community Health*, 2010. **66**: p. 420-426.

Figure 2. Health-related claims restricted (Models 1a, 2a)

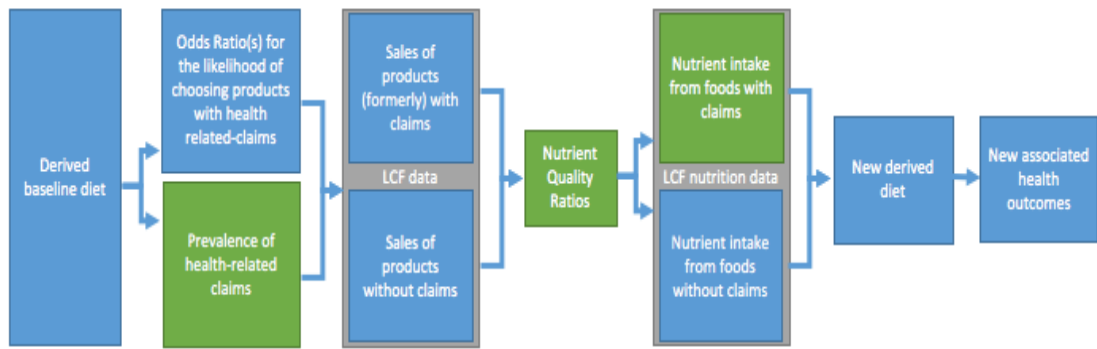

In Models 1a and 2a the use of HRCs is restricted using a nutrient profile model so that only foods that pass the FSANZ NPSC (Model 1a) or the nutrient profile model proposed by the EU (Model 2a) may carry health-related claims. In these Models foods that currently carry HRCs but fail the nutrient profile model(s) are considered not to carry a HRC any longer. For example, if 26% of foods carry HRCs, but 38% of these foods fail the FSANZ NPSC, the expected prevalence of HRCs under the FSANZ NPSC would be reduced to 16%.

Figure 3. Health-related claims restricted and reformulated (Models 1b, 2b)

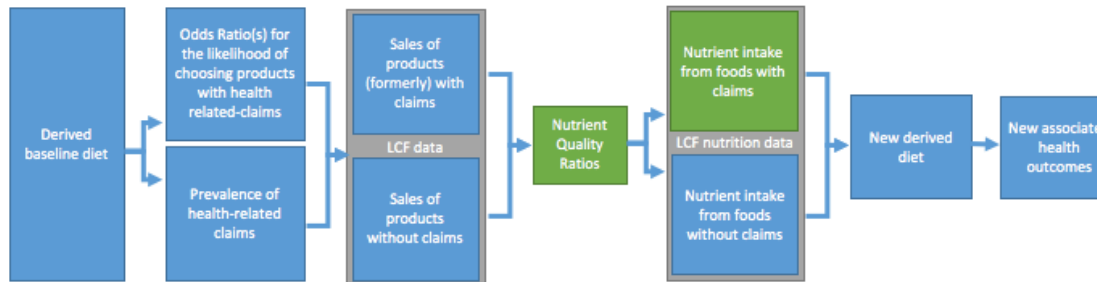

In these scenarios the use of HRCs is restricted with a nutrient profile model, but the HRC prevalence is maintained at current levels. Thus, these models suggest that manufacturers of foods that currently carry claims but fail to meet a nutrient profile model would choose to reformulate these foods rather than lose the HRC – hence, the prevalence of HRCs remains the same as in the baseline scenario but the nutritional quality of foods that carry claims increases to the levels in Models 1a and 2a.

## Draft EU nutrient profile model for the regulation of health and nutrition claims

Draft Commission Regulation of 17<sup>th</sup> March 2009: Specific nutrient profiles and conditions of use, which food or certain categories of food must comply with in order to bear nutrition or health claims (personal communication).

| Food category                                                                                                              |                                                                                                                                                                                                       | Thresholds       |                        |                       |
|----------------------------------------------------------------------------------------------------------------------------|-------------------------------------------------------------------------------------------------------------------------------------------------------------------------------------------------------|------------------|------------------------|-----------------------|
|                                                                                                                            |                                                                                                                                                                                                       | Sodium (mg/100g) | Saturated fat (g/100g) | Total sugars (g/100g) |
| Vegetable oils, butter and spreadable fats, as defined in Article 115 and Annex XV of Council Regulation (EC) No 1234/2007 |                                                                                                                                                                                                       | 500              | 30                     | 10                    |
| Products of fruits, vegetables, and seeds except oils                                                                      | Products of fruits and vegetables products, except oils. Minimum 50g of fruit and/or vegetables, except for nectars covered by Directive (EC) No 112/2001.                                            | 400              | 5                      | 15                    |
|                                                                                                                            | Seeds products, except oils. Minimum 50% of nuts per 100g of finished products.                                                                                                                       | 400              | 10                     | 15                    |
| Meat based products. Minimum 50g of meat or 100g of finished products.                                                     |                                                                                                                                                                                                       | 800              | 8                      | 10                    |
| Fishery products, crustaceans, and molluscs. Minimum 50g per 100g of finished products.                                    |                                                                                                                                                                                                       | 800              | 10                     | 10                    |
| Dairy products as defined in Council Regulation (EC) No 1234/2007, Annex XII                                               | Dairy products, except cheeses. Minimum 50g of dairy constituents per 100g of finished products, except for drinks based on fermented milks, Minimum 40g per 100g for drinks based on fermented milks | 300              | 2.6                    | 15                    |
|                                                                                                                            | Cheeses. Minimum 50g of dairy constituents per 100g of finished products                                                                                                                              | 900              | 20                     | 15                    |
| Cereal and cereal products                                                                                                 | Cereal and cereal products except breakfast cereals and fine bakery wares. Minimum 50g of cereals per 100g of finished products.                                                                      | 400              | 5                      | 15                    |
|                                                                                                                            | Biscuits and other fine bakery wares. Minimum 30g of cereals per 100g of finished products for fine bakery wares                                                                                      | 500              | 8                      | 25                    |
|                                                                                                                            | Breakfast cereals. Minimum 50g of cereals per 100g of finished products                                                                                                                               | 500              | 5                      | 25                    |
| Ready meals, soups and sandwiches                                                                                          | Soups. Minimum 200g per serving size.                                                                                                                                                                 | 400              | 5                      | 10                    |
|                                                                                                                            | Ready meals and sandwiches. Minimum 200g per serving size. Minimum 2 of the following for – 30g fruits, vegetables, and/or nuts, 30g cereals, 30g meat, 30g fish, and/or 30g milk.                    |                  |                        |                       |
| Soy based products                                                                                                         | Soy based products containing between 3 and 10% soy protein                                                                                                                                           | 300              | 2.6                    | 15                    |
|                                                                                                                            | Soy based products containing more than 10% soy protein                                                                                                                                               | 800              | 8                      | 10                    |
| Non-alcoholic beverages, insofar as they do not qualify for one of the above mentioned food categories                     |                                                                                                                                                                                                       | 300              | 2                      | 8                     |
| Other foods, insofar as they do not qualify for one of the above mentioned food categories                                 |                                                                                                                                                                                                       | 300              | 2                      | 10                    |

## RESULTS

Table 1. Nutrient intake (per day) under each health-related claim (HRC) scenario

| Model    | Nutrients from foods... | % of total sales | Energy (kcal) | Protein (g) | Carbohydrate (g) | Total sugars (g) | Total fat (g) | Saturated fat (g) | MUFAS (g) | PUFAS (g) | Fibre (g) | Sodium (g) | Cholesterol (mg) | Fruit (g) | Vegetables (g) |
|----------|-------------------------|------------------|---------------|-------------|------------------|------------------|---------------|-------------------|-----------|-----------|-----------|------------|------------------|-----------|----------------|
| Baseline | with HRCs               | 37%              | 558.9         | 21.2        | 78.4             | 35.4             | 19.3          | 5.5               | 9.2       | 4.3       | 5.7       | 0.5        | 75.1             | 91.9      | 54.5           |
|          | without HRCs            | 63%              | 1347.8        | 44.9        | 155.5            | 70.5             | 60.4          | 25.5              | 20.1      | 9.9       | 6.8       | 1.8        | 149.0            | 59.3      | 76.6           |
|          | Total                   | 100%             | 1906.8        | 66.1        | 233.8            | 105.9            | 79.7          | 31.0              | 29.4      | 14.2      | 12.6      | 2.3        | 224.1            | 151.2     | 131.1          |
| 1a       | with HRCs               | 27%              | 299.2         | 13.6        | 45.8             | 20.3             | 9.5           | 2.0               | 5.4       | 2.5       | 4.5       | 0.2        | 46.1             | 93.2      | 55.3           |
|          | without HRCs            | 73%              | 1589.2        | 52.8        | 182.0            | 83.3             | 71.9          | 30.4              | 24.0      | 11.7      | 7.8       | 2.2        | 178.0            | 61.8      | 79.8           |
|          | Total                   | 100%             | 1888.4        | 66.5        | 227.8            | 103.7            | 81.4          | 32.4              | 29.4      | 14.2      | 12.3      | 2.3        | 224.1            | 154.9     | 135.1          |
| 2a       | with HRCs               | 28%              | 342.5         | 15.8        | 48.0             | 20.1             | 11.2          | 2.7               | 6.0       | 2.7       | 4.3       | 0.2        | 54.1             | 83.2      | 56.1           |
|          | without HRCs            | 72%              | 1556.3        | 51.0        | 180.5            | 82.5             | 70.0          | 29.6              | 23.3      | 11.5      | 7.8       | 2.1        | 170.0            | 64.3      | 83.1           |
|          | Total                   | 100%             | 1898.8        | 66.8        | 228.5            | 102.6            | 81.2          | 32.2              | 29.4      | 14.2      | 12.1      | 2.3        | 224.1            | 147.6     | 139.3          |
| 1b       | with HRCs               | 37%              | 468.8         | 20.2        | 67.3             | 24.7             | 16.8          | 3.3               | 9.2       | 4.3       | 6.4       | 0.3        | 75.1             | 97.4      | 57.9           |
|          | without HRCs            | 63%              | 1347.8        | 44.9        | 155.5            | 70.5             | 60.4          | 25.5              | 20.1      | 9.9       | 6.8       | 1.8        | 149.0            | 59.3      | 76.6           |
|          | Total                   | 100%             | 1816.6        | 65.1        | 222.7            | 95.2             | 77.2          | 28.7              | 29.4      | 14.2      | 13.2      | 2.1        | 224.1            | 156.7     | 134.5          |
| 2b       | with HRCs               | 37%              | 498.7         | 21.0        | 69.6             | 24.6             | 17.6          | 3.9               | 9.2       | 4.3       | 5.9       | 0.3        | 75.1             | 91.4      | 61.6           |
|          | without HRCs            | 63%              | 1347.8        | 44.9        | 155.5            | 70.5             | 60.4          | 25.5              | 20.1      | 9.9       | 6.8       | 1.8        | 149.0            | 59.3      | 76.6           |
|          | Total                   | 100%             | 1846.5        | 65.9        | 225.0            | 95.0             | 78.0          | 29.3              | 29.4      | 14.2      | 12.8      | 2.1        | 224.1            | 150.6     | 138.2          |

Table 2. Nutrient intake (by food group) under each health-related claim (HRC) scenario, purchase averages g/ml per person, per week (LCF 2014)

| Model    | Food group                                                  | Purchases | Energy (kcal) | Protein (g) | Total fat (g) | Saturated fat (g) | Carbohydrate (g) | Total sugars (g) | Fibre (g) | Sodium (g) | MUFAs (g) | PUFAs (g) | Cholesterol (mg) | Fruit (g) | Vegetables (g) |
|----------|-------------------------------------------------------------|-----------|---------------|-------------|---------------|-------------------|------------------|------------------|-----------|------------|-----------|-----------|------------------|-----------|----------------|
| Baseline | Potatoes, bread, rice, pasta or other starchy carbohydrates | 1518.1    | 421.4         | 12.8        | 5.7           | 1.5               | 84.8             | 6.4              | 5.3       | 0.55       | 1.8       | 1.6       | 2.6              | 0.0       | 0.0            |
|          | Composite foods                                             | 556.5     | 152.8         | 8.0         | 8.0           | 2.7               | 13.1             | 2.0              | 0.7       | 0.33       | 3.1       | 1.6       | 26.0             | 0.0       | 0.0            |
|          | Foods and drinks high in fat and/or sugar                   | 2840.2    | 687.6         | 6.2         | 37.8          | 14.7              | 86.1             | 59.3             | 1.8       | 0.63       | 14.1      | 7.2       | 40.0             | 0.0       | 0.0            |
|          | Fruit and vegetables                                        | 1973.3    | 102.1         | 2.7         | 1.1           | 0.2               | 21.9             | 20.0             | 3.3       | 0.04       | 0.3       | 0.4       | 0.3              | 1058.4    | 917.8          |
|          | Beans, pulses, fish, eggs, meat and other protein           | 929.2     | 260.0         | 22.3        | 17.1          | 5.5               | 4.7              | 1.6              | 1.1       | 0.50       | 7.3       | 2.9       | 124.8            | 0.0       | 0.0            |
|          | Dairy or dairy alternatives                                 | 1835.4    | 192.5         | 12.5        | 9.6           | 6.1               | 14.9             | 14.6             | 0.0       | 0.22       | 2.6       | 0.4       | 29.6             | 0.0       | 0.0            |
|          | Excluded/Miscellaneous                                      | 1187.1    | 90.4          | 1.8         | 0.6           | 0.2               | 8.4              | 2.0              | 0.3       | 0.08       | 0.2       | 0.1       | 0.8              | 0.0       | 0.0            |
|          | ALL FOODS                                                   | 10839.8   | 1906.8        | 66.1        | 79.7          | 31.0              | 233.8            | 105.9            | 12.6      | 2.35       | 29.4      | 14.2      | 224.1            | 1058.4    | 917.8          |
| 1a       | Potatoes, bread, rice, pasta or other starchy carbohydrates | 1518.1    | 408.6         | 13.0        | 5.0           | 1.3               | 83.1             | 4.5              | 5.2       | 0.56       | 1.8       | 1.6       | 2.6              | 0.0       | 0.0            |
|          | Composite foods                                             | 556.5     | 151.8         | 7.8         | 8.0           | 2.7               | 12.9             | 1.9              | 0.7       | 0.33       | 3.1       | 1.6       | 26.0             | 0.0       | 0.0            |
|          | Foods and drinks high in fat and/or sugar                   | 2840.2    | 690.5         | 6.3         | 39.3          | 15.7              | 83.4             | 59.8             | 1.7       | 0.61       | 14.1      | 7.2       | 40.0             | 0.0       | 0.0            |
|          | Fruit and vegetables                                        | 1973.3    | 100.6         | 2.7         | 1.0           | 0.2               | 22.3             | 20.3             | 3.3       | 0.04       | 0.3       | 0.4       | 0.3              | 1084.5    | 946.0          |
|          | Beans, pulses, fish, eggs, meat and other protein           | 929.2     | 256.6         | 22.1        | 17.2          | 5.7               | 4.1              | 1.4              | 1.0       | 0.49       | 7.3       | 2.9       | 124.8            | 0.0       | 0.0            |
|          | Dairy or dairy alternatives                                 | 1835.4    | 198.7         | 12.9        | 10.4          | 6.7               | 14.5             | 14.0             | 0.0       | 0.23       | 2.6       | 0.4       | 29.6             | 0.0       | 0.0            |
|          | Excluded/Miscellaneous                                      | 1187.1    | 81.7          | 1.6         | 0.5           | 0.2               | 7.6              | 1.8              | 0.3       | 0.07       | 0.2       | 0.1       | 0.8              | 0.0       | 0.0            |
|          | ALL FOODS                                                   | 10839.8   | 1888.4        | 66.5        | 81.4          | 32.4              | 227.8            | 103.7            | 12.3      | 2.33       | 29.4      | 14.2      | 224.1            | 1084.5    | 946.0          |
| 2a       | Bread, rice, potatoes, pasta, etc.                          | 1518.1    | 409.6         | 12.8        | 5.1           | 1.3               | 83.3             | 4.5              | 4.9       | 0.5        | 1.8       | 1.6       | 2.6              | 0.0       | 0.0            |
|          | Composite foods                                             | 556.5     | 151.5         | 7.9         | 8.0           | 2.7               | 12.9             | 1.9              | 0.7       | 0.3        | 3.1       | 1.6       | 26.0             | 0.0       | 0.0            |

| Model | Food group                                                  | Purchases | Energy (kcal) | Protein (g) | Total fat (g) | Saturated fat (g) | Carbohydrate (g) | Total sugars (g) | Fibre (g) | Sodium (g) | MUFAs (g) | PUFAs (g) | Cholesterol (mg) | Fruit (g) | Vegetables (g) |
|-------|-------------------------------------------------------------|-----------|---------------|-------------|---------------|-------------------|------------------|------------------|-----------|------------|-----------|-----------|------------------|-----------|----------------|
|       | Foods and drinks high in fat and/or sugar                   | 2840.2    | 694.4         | 6.3         | 39.7          | 15.7              | 83.8             | 59.4             | 1.7       | 0.6        | 14.1      | 7.2       | 40.0             | 0.0       | 0.0            |
|       | Fruit and vegetables                                        | 1973.3    | 101.8         | 2.8         | 1.0           | 0.2               | 21.7             | 19.5             | 3.3       | 0.0        | 0.3       | 0.4       | 0.3              | 1033.0    | 974.9          |
|       | Meat, fish, eggs, beans, etc.                               | 929.2     | 252.6         | 22.4        | 16.7          | 5.5               | 4.0              | 1.4              | 1.0       | 0.5        | 7.3       | 2.9       | 124.8            | 0.0       | 0.0            |
|       | Milk and dairy foods                                        | 1835.4    | 198.9         | 12.8        | 10.2          | 6.6               | 14.4             | 13.9             | 0.0       | 0.2        | 2.6       | 0.4       | 29.6             | 0.0       | 0.0            |
|       | Excluded/Miscellaneous                                      | 1187.1    | 90.0          | 1.8         | 0.6           | 0.2               | 8.3              | 2.0              | 0.3       | 0.1        | 0.2       | 0.1       | 0.8              | 0.0       | 0.0            |
|       | ALL FOODS                                                   | 10839.8   | 1867.7        | 67.6        | 80.6          | 31.7              | 220.0            | 98.4             | 11.9      | 2.1        | 29.4      | 14.2      | 224.1            | 1085.0    | 1039.5         |
| 1b    | Potatoes, bread, rice, pasta or other starchy carbohydrates | 1518.1    | 411.3         | 13.2        | 4.9           | 1.2               | 83.3             | 4.6              | 5.9       | 0.52       | 1.8       | 1.6       | 2.6              | 0.0       | 0.0            |
|       | Composite foods                                             | 556.5     | 148.5         | 7.8         | 7.8           | 2.6               | 12.5             | 1.9              | 0.7       | 0.32       | 3.1       | 1.6       | 26.0             | 0.0       | 0.0            |
|       | Foods and drinks high in fat and/or sugar                   | 2840.2    | 637.3         | 5.5         | 36.7          | 13.6              | 78.3             | 50.9             | 1.6       | 0.53       | 14.1      | 7.2       | 40.0             | 0.0       | 0.0            |
|       | Fruit and vegetables                                        | 1973.3    | 99.8          | 2.7         | 1.0           | 0.2               | 22.3             | 20.4             | 3.3       | 0.04       | 0.3       | 0.4       | 0.3              | 1097.0    | 941.2          |
|       | Beans, pulses, fish, eggs, meat and other protein           | 929.2     | 261.1         | 22.0        | 17.3          | 5.1               | 4.5              | 1.4              | 1.3       | 0.43       | 7.3       | 2.9       | 124.8            | 0.0       | 0.0            |
|       | Dairy or dairy alternatives                                 | 1835.4    | 181.8         | 12.2        | 9.1           | 5.9               | 14.5             | 14.3             | 0.0       | 0.20       | 2.6       | 0.4       | 29.6             | 0.0       | 0.0            |
|       | Excluded/Miscellaneous                                      | 1187.1    | 76.8          | 1.6         | 0.5           | 0.1               | 7.2              | 1.7              | 0.3       | 0.06       | 0.2       | 0.1       | 0.8              | 0.0       | 0.0            |
|       | ALL FOODS                                                   | 10839.8   | 1816.6        | 65.1        | 77.2          | 28.7              | 222.7            | 95.2             | 13.2      | 2.11       | 29.4      | 14.2      | 224.1            | 1097.0    | 941.2          |
| 2b    | Potatoes, bread, rice, pasta or other starchy carbohydrates | 1518.1    | 413.1         | 12.9        | 5.0           | 1.2               | 83.8             | 4.7              | 5.6       | 0.50       | 1.8       | 1.6       | 2.6              | 0.0       | 0.0            |
|       | Composite foods                                             | 556.5     | 150.2         | 7.9         | 7.9           | 2.7               | 12.7             | 1.9              | 0.7       | 0.32       | 3.1       | 1.6       | 26.0             | 0.0       | 0.0            |
|       | Foods and drinks high in fat and/or sugar                   | 2840.2    | 651.8         | 5.7         | 37.7          | 13.9              | 79.8             | 51.4             | 1.6       | 0.53       | 14.1      | 7.2       | 40.0             | 0.0       | 0.0            |
|       | Fruit and vegetables                                        | 1973.3    | 100.2         | 2.7         | 1.0           | 0.2               | 21.7             | 19.7             | 3.3       | 0.04       | 0.3       | 0.4       | 0.3              | 1054.5    | 967.6          |
|       | Beans, pulses, fish, eggs, meat and other protein           | 929.2     | 253.5         | 22.5        | 16.5          | 5.1               | 4.3              | 1.4              | 1.1       | 0.46       | 7.3       | 2.9       | 124.8            | 0.0       | 0.0            |
|       | Dairy or dairy alternatives                                 | 1835.4    | 187.3         | 12.3        | 9.3           | 6.0               | 14.4             | 14.1             | 0.0       | 0.21       | 2.6       | 0.4       | 29.6             | 0.0       | 0.0            |

| Model | Food group             | Purchases | Energy (kcal) | Protein (g) | Total fat (g) | Saturated fat (g) | Carbohydrate (g) | Total sugars (g) | Fibre (g) | Sodium (g) | MUFAs (g) | PUFAs (g) | Cholesterol (mg) | Fruit (g) | Vegetables (g) |
|-------|------------------------|-----------|---------------|-------------|---------------|-------------------|------------------|------------------|-----------|------------|-----------|-----------|------------------|-----------|----------------|
|       | Excluded/Miscellaneous | 1187.1    | 90.3          | 1.8         | 0.6           | 0.2               | 8.4              | 1.9              | 0.3       | 0.06       | 0.2       | 0.1       | 0.8              | 0.0       | 0.0            |
|       | ALL FOODS              | 10839.8   | 1846.5        | 65.9        | 78.0          | 29.3              | 225.0            | 95.0             | 12.8      | 2.12       | 29.4      | 14.2      | 224.1            | 1054.5    | 967.6          |
